# Supplementary material for: Injectable hydrogels based on MPEG–PCL–RGD and BMSCs for bone tissue engineering
Source: Royal Society of Chemistry journal article supplement (doi:10.1039/d0bm00588f), 2020-01-01
Supplement: d0bm00588f1.pdf [file d0bm00588f1.pdf]

## ***Supplementary Information***

### **Injectable hydrogels based on MPEG-PCL-RGD and BMSCs for bone tissue engineering**

Hyun Joo Kim<sup>a,b</sup>, Su Jung You<sup>b</sup>, Dae Hyeok Yang<sup>b</sup>, Jin Eun<sup>c</sup>, Hae Kwan Park<sup>c</sup>, Moon Suk Kim<sup>d</sup> and Heung Jae Chun<sup>\*,a,b,e</sup>

*<sup>a</sup>Department of Biomedicine & Health Sciences, <sup>b</sup>Institute of Cell and Tissue Engineering,*

*<sup>e</sup>Department of Medical Life Sciences College of Medicine, The Catholic University of Korea, Seoul 06591, Republic of Korea*

*<sup>c</sup>Department of neurosurgery, Eunpyeong St. Mary's Hospital, College of Medicine, The Catholic University of Korea, Seoul 03312, Republic of Korea*

*<sup>d</sup>Department of Molecular Science and Technology, Ajou University, Suwon, 16499, Republic of Korea*

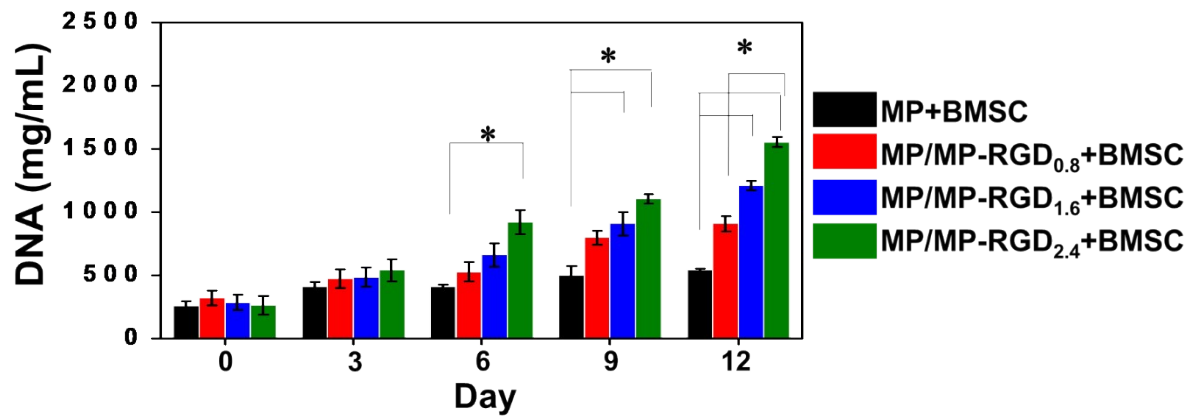

**Supplementary Fig. 1**

Supplementary Fig. 1 Evaluation of MSCs proliferation in hydrogels. Quantification of dsDNA in MP and MP/MP-RGD hydrogels by PicoGreen assay on days 0, 3, 6, 9 and 12.
